# Supplementary material
Source: Springer Nature journal article supplement (https://www.springermedizin.de/resource/supplementary/12936_2008_547_MOESM4_ESM.pdf/9548260)

*n* isolates of given genotype

50  
45  
40  
35  
30  
25  
20  
15  
10  
5  
0

Colombia

Thailand

Indonesia

Sri Lanka

India

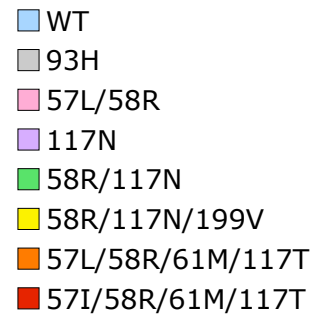

Supplement: MOESM4 [file 9548260]
